# Supplementary material
Source: Springer Nature journal article supplement (https://www.springermedizin.de/resource/supplementary/12879_2012_2096_MOESM1_ESM.pdf/9443604)
Supplement: MOESM1 [file 9443604]

**TABLE S2.** Homology analysis of the  $\Delta 530$  region of *A. actinomycetemcomitans* non-JP2 strains.

| Strain<br>(serotype) | ATCC   | SUNYaB | TN-1   | <sup>a</sup> Y4 | HK     | <sup>a</sup> ATCC | ATCC   | HK     | SUNYaB | NCTC   | 3381   | IDH    | OMZ    | OMZ    | OMZ    | NUM    | NUM    |
|----------------------|--------|--------|--------|-----------------|--------|-------------------|--------|--------|--------|--------|--------|--------|--------|--------|--------|--------|--------|
|                      | 29523  | 75 (a) | (a)    | (b)             | 1709   | 29522             | 29524  | 916    | 67 (c) | 9709   | (d)    | 781    | 534    | 541    | 546    | 5505   | 4039   |
|                      | (a)    |        |        |                 | (b)    | (b)               | (b)    | (c)    |        | (c)    |        | (d)    | (e)    | (e)    | (e)    | (f)    | (g)    |
| ATCC                 | 100    | 100    | 100    | 98.682          | 100    | 98.493            | 99.435 | 99.812 | 98.682 | 100    | 100    | 98.483 | 99.435 | 99.247 | 97.363 | 100    | 100    |
| 29523 (a)            |        |        |        |                 |        |                   |        |        |        |        |        |        |        |        |        |        |        |
| SUNYaB               | 100    | 100    | 100    | 98.682          | 100    | 98.493            | 99.435 | 99.812 | 98.682 | 100    | 100    | 98.493 | 99.435 | 99.247 | 97.363 | 100    | 100    |
| 75 (a)               |        |        |        |                 |        |                   |        |        |        |        |        |        |        |        |        |        |        |
| TN-1 (a)             | 100    | 100    | 100    | 98.682          | 100    | 98.493            | 99.345 | 99.812 | 98.682 | 100    | 100    | 98.493 | 99.435 | 99.247 | 97.363 | 100    | 100    |
| <sup>a</sup> Y4 (b)  | 98.682 | 98.682 | 98.682 | 100             | 98.682 | 99.811            | 98.87  | 98.493 | 100    | 98.682 | 98.682 | 97.175 | 99.247 | 99.058 | 97.175 | 98.682 | 98.682 |
| HK1709               | 100    | 100    | 100    | 98.682          | 100    | 98.493            | 98.435 | 99.812 | 98.682 | 100    | 100    | 98.493 | 99.435 | 99.247 | 97.363 | 100    | 100    |
| (b)                  |        |        |        |                 |        |                   |        |        |        |        |        |        |        |        |        |        |        |
| <sup>a</sup> ATCC    | 98.493 | 98.493 | 98.493 | 99.811          | 98.493 | 100               | 98.682 | 98.305 | 99.811 | 98.493 | 98.493 | 96.987 | 99.058 | 98.87  | 96.987 | 98.493 | 98.493 |
| 29522 (b)            |        |        |        |                 |        |                   |        |        |        |        |        |        |        |        |        |        |        |
| ATCC                 | 99.435 | 99.435 | 99.435 | 98.87           | 99.435 | 98.682            | 100    | 99.247 | 98.87  | 99.435 | 99.435 | 97.928 | 99.623 | 99.435 | 97.552 | 99.435 | 99.435 |
| 29524 (b)            |        |        |        |                 |        |                   |        |        |        |        |        |        |        |        |        |        |        |
| HK                   | 99.812 | 99.812 | 99.812 | 98.493          | 99.812 | 98.305            | 99.247 | 100    | 98.493 | 99.812 | 99.812 | 98.305 | 99.247 | 99.058 | 97.175 | 99.812 | 99.812 |
| 916 (c)              |        |        |        |                 |        |                   |        |        |        |        |        |        |        |        |        |        |        |
| SUNYaB               | 98.682 | 98.682 | 98.682 | 100             | 98.682 | 99.811            | 98.87  | 98.493 | 100    | 98.682 | 98.682 | 97.175 | 99.247 | 99.058 | 97.175 | 98.682 | 98.682 |
| 67 (c)               |        |        |        |                 |        |                   |        |        |        |        |        |        |        |        |        |        |        |
| NCTC                 | 100    | 100    | 100    | 98.682          | 100    | 98.493            | 99.435 | 99.812 | 98.682 | 100    | 100    | 98.493 | 99.435 | 99.247 | 97.363 | 100    | 100    |
| 9709 (c)             |        |        |        |                 |        |                   |        |        |        |        |        |        |        |        |        |        |        |
| 3381 (d)             | 100    | 100    | 100    | 98.682          | 100    | 98.493            | 99.345 | 99.812 | 98.682 | 100    | 100    | 98.493 | 99.435 | 99.247 | 97.363 | 100    | 100    |

|         |     |        |        |        |        |        |        |        |        |        |        |        |        |        |        |        |        |        |
|---------|-----|--------|--------|--------|--------|--------|--------|--------|--------|--------|--------|--------|--------|--------|--------|--------|--------|--------|
| IDH     | 781 | 98.493 | 98.493 | 98.493 | 97.175 | 98.493 | 96.978 | 97.928 | 98.305 | 97.175 | 98.493 | 98.493 | 100    | 97.928 | 97.74  | 98.493 | 98.493 | 98.493 |
| (d)     |     |        |        |        |        |        |        |        |        |        |        |        |        |        |        |        |        |        |
| OMZ534  |     | 99.435 | 99.435 | 99.435 | 99.247 | 99.435 | 99.058 | 99.623 | 99.247 | 99.247 | 99.435 | 99.435 | 97.928 | 100    | 99.821 | 97.928 | 99.435 | 99.435 |
| (e)     |     |        |        |        |        |        |        |        |        |        |        |        |        |        |        |        |        |        |
| OMZ541  |     | 99.247 | 99.247 | 99.247 | 99.058 | 99.247 | 98.87  | 99.435 | 99.058 | 99.058 | 99.247 | 99.247 | 97.74  | 99.821 | 100    | 97.740 | 99.247 | 99.247 |
| (e)     |     |        |        |        |        |        |        |        |        |        |        |        |        |        |        |        |        |        |
| OMZ546  |     | 97.363 | 97.363 | 97.363 | 99.175 | 97.363 | 96.987 | 97.552 | 97.175 | 97.175 | 97.363 | 97.363 | 98.493 | 97.928 | 97.74  | 100    | 97.363 | 97.363 |
| (e)     |     |        |        |        |        |        |        |        |        |        |        |        |        |        |        |        |        |        |
| NUM5505 |     | 100    | 100    | 100    | 98.682 | 100    | 98.493 | 99.345 | 99.812 | 98.682 | 100    | 100    | 98.493 | 99.435 | 99.247 | 97.363 | 100    | 100    |
| (f)     |     |        |        |        |        |        |        |        |        |        |        |        |        |        |        |        |        |        |
| NUM4039 |     | 100    | 100    | 100    | 98.682 | 100    | 98.493 | 99.345 | 99.812 | 98.682 | 100    | 100    | 98.493 | 99.435 | 99.247 | 97.363 | 100    | 100    |
| (g)     |     |        |        |        |        |        |        |        |        |        |        |        |        |        |        |        |        |        |

---

\*Δ530 region are consisted of 528 bp and all other strains are consisted of 531 bp.
